# Supplementary material
Source: MDPI journal article supplement (https://www.mdpi.com/2624-7402/5/2/51)
Supplement: s1 [file s1]

# Supplementary Materials

**Table S1.** Means of volume median diameter, relative span factor, coverage area and droplet density at the upper third of corn plants.

| Upper Third           |                  |                                         |      |      |                                         |     |       |                                         |       |      |                                         |        |        |                                         |       |       |
|-----------------------|------------------|-----------------------------------------|------|------|-----------------------------------------|-----|-------|-----------------------------------------|-------|------|-----------------------------------------|--------|--------|-----------------------------------------|-------|-------|
| Droplet Class         | Adjuvant Use     | Deposition ( $\mu\text{g cm}^{-2}$ )    |      |      | VMD ( $\mu\text{m}$ )                   |     |       | Relative span                           |       |      | Coverage (%)                            |        |        | Density (droplets $\text{cm}^{-2}$ )    |       |       |
|                       |                  | Application Rate ( $\text{L ha}^{-1}$ ) |      |      | Application Rate ( $\text{L ha}^{-1}$ ) |     |       | Application Rate ( $\text{L ha}^{-1}$ ) |       |      | Application Rate ( $\text{L ha}^{-1}$ ) |        |        | Application Rate ( $\text{L ha}^{-1}$ ) |       |       |
|                       |                  | 80                                      | 150  | Mean | 80                                      | 150 | Mean  | 80                                      | 150   | Mean | 80                                      | 150    | Mean   | 80                                      | 150   | Mean  |
| Fine                  | Without adjuvant | 0.25                                    | 0.24 | 0.24 | 161                                     | 137 | 149   | 0.48                                    | 0.64  | 0.56 | 6.80                                    | 11.67  | 9.23   | 147                                     | 349   | 248   |
|                       | Nimbus           | 0.17                                    | 0.24 | 0.21 | 150                                     | 156 | 153   | 0.52                                    | 0.53  | 0.52 | 3.52                                    | 8.58   | 6.05   | 82                                      | 181   | 132   |
|                       | Assist           | 0.20                                    | 0.18 | 0.19 | 151                                     | 156 | 154   | 0.58                                    | 0.74  | 0.66 | 6.40                                    | 10.17  | 8.29   | 146                                     | 220   | 183   |
|                       | Mean             | 0.21                                    | 0.22 | 0.21 | 154                                     | 150 | 152** | 0.52                                    | 0.64  | 0.58 | 5.57                                    | 10.14  | 7.86** | 125                                     | 250   | 188** |
| Course                | Without adjuvant | 0.29                                    | 0.25 | 0.27 | 226                                     | 246 | 236   | 0.77                                    | 0.78  | 0.78 | 2.20                                    | 6.67   | 4.44   | 20                                      | 69    | 44    |
|                       | Nimbus           | 0.19                                    | 0.34 | 0.27 | 256                                     | 220 | 238   | 0.50                                    | 0.66  | 0.58 | 2.37                                    | 8.20   | 5.29   | 19                                      | 97    | 58    |
|                       | Assist           | 0.24                                    | 0.34 | 0.29 | 237                                     | 230 | 233   | 0.46                                    | 0.74  | 0.60 | 1.83                                    | 5.98   | 3.90   | 12                                      | 60    | 36    |
|                       | Mean             | 0.24                                    | 0.31 | 0.27 | 240                                     | 232 | 236** | 0.58                                    | 0.73  | 0.65 | 2.13                                    | 6.95   | 4.54** | 17                                      | 75    | 46**  |
| Application rate mean |                  | 0.23                                    | 0.26 | 0.24 | 197                                     | 191 | 194   | 0.55*                                   | 0.68* | 0.62 | 3.85**                                  | 8.55** | 6.20   | 71**                                    | 163** | 117   |

VMD: volume median diameter. \*significant at 0.05 level of significance; \*\* significant at 0.01 level of significance and ns not significant in ANOVA.

**Table S2.** Means of volume median diameter, relative span factor, coverage area and droplet density at the middle third of corn plants.

| Middle Third          |                  |                                            |      |      |                                            |     |       |                                            |      |      |                                            |        |       |                                            |      |      |
|-----------------------|------------------|--------------------------------------------|------|------|--------------------------------------------|-----|-------|--------------------------------------------|------|------|--------------------------------------------|--------|-------|--------------------------------------------|------|------|
| Droplet Class         | Adjuvant Use     | Deposition<br>( $\mu\text{g cm}^{-2}$ )    |      |      | VMD<br>( $\mu\text{m}$ )                   |     |       | Relative span                              |      |      | Coverage<br>(%)                            |        |       | Density<br>(droplets $\text{cm}^{-2}$ )    |      |      |
|                       |                  | Application<br>Rate ( $\text{L ha}^{-1}$ ) |      |      | Application<br>Rate ( $\text{L ha}^{-1}$ ) |     |       | Application<br>Rate ( $\text{L ha}^{-1}$ ) |      |      | Application<br>Rate ( $\text{L ha}^{-1}$ ) |        |       | Application<br>Rate ( $\text{L ha}^{-1}$ ) |      |      |
|                       |                  | 80                                         | 150  | Mean | 80                                         | 150 | Mean  | 80                                         | 150  | Mean | 80                                         | 150    | Mean  | 80                                         | 150  | Mean |
| Fine                  | Without adjuvant | 0.22                                       | 0.23 | 0.22 | 187                                        | 147 | 167   | 0.50                                       | 0.70 | 0.60 | 2.71                                       | 7.93   | 5.32  | 43                                         | 195  | 119  |
|                       | Nimbus           | 0.14                                       | 0.17 | 0.15 | 180                                        | 170 | 175   | 0.61                                       | 0.49 | 0.55 | 3.55                                       | 5.71   | 4.63  | 52                                         | 107  | 79   |
|                       | Assist           | 0.17                                       | 0.18 | 0.18 | 178                                        | 183 | 181   | 0.53                                       | 0.52 | 0.52 | 3.71                                       | 5.84   | 4.78  | 63                                         | 87   | 75   |
|                       | Mean             | 0.18                                       | 0.19 | 0.18 | 182                                        | 167 | 174** | 0.55                                       | 0.57 | 0.56 | 3.32                                       | 6.49   | 4.91* | 53*                                        | 130* | 91   |
| Course                | Without adjuvant | 0.16                                       | 0.22 | 0.19 | 261                                        | 292 | 277   | 0.67                                       | 0.86 | 0.76 | 1.47                                       | 5.66   | 3.56  | 14                                         | 41   | 27   |
|                       | Nimbus           | 0.18                                       | 0.28 | 0.23 | 299                                        | 279 | 289   | 0.41                                       | 0.66 | 0.54 | 2.28                                       | 3.96   | 3.12  | 15                                         | 27   | 21   |
|                       | Assist           | 0.17                                       | 0.20 | 0.18 | 314                                        | 282 | 298   | 0.72                                       | 0.68 | 0.70 | 1.52                                       | 5.56   | 3.54  | 7                                          | 36   | 22   |
|                       | Mean             | 0.17                                       | 0.23 | 0.20 | 292                                        | 285 | 288** | 0.60                                       | 0.73 | 0.67 | 1.76                                       | 5.06   | 3.41* | 12*                                        | 35*  | 23   |
| Application rate mean |                  | 0.17                                       | 0.21 | 0.19 | 237                                        | 226 | 231   | 0.57                                       | 0.65 | 0.61 | 2.54**                                     | 5.78** | 4.16  | 32                                         | 82   | 57   |

VMD: volume median diameter. \*significant at 0.05 level of significance; \*\* significant at 0.01 level of significance and ns not significant in ANOVA.

**Table S3.** Means of volume median diameter, relative span factor, coverage area and droplet density at the lower third of corn plants.

| Lower Third           |                  |                                            |      |       |                                            |     |       |                                            |      |      |                                            |       |       |                                            |     |      |
|-----------------------|------------------|--------------------------------------------|------|-------|--------------------------------------------|-----|-------|--------------------------------------------|------|------|--------------------------------------------|-------|-------|--------------------------------------------|-----|------|
| Droplet Class         | Adjuvant Use     | Deposition<br>( $\mu\text{g cm}^{-2}$ )    |      |       | VMD<br>( $\mu\text{m}$ )                   |     |       | Relative span                              |      |      | Coverage<br>(%)                            |       |       | Density<br>(droplets $\text{cm}^{-2}$ )    |     |      |
|                       |                  | Application Rate<br>( $\text{L ha}^{-1}$ ) |      |       | Application Rate<br>( $\text{L ha}^{-1}$ ) |     |       | Application Rate<br>( $\text{L ha}^{-1}$ ) |      |      | Application Rate<br>( $\text{L ha}^{-1}$ ) |       |       | Application Rate<br>( $\text{L ha}^{-1}$ ) |     |      |
|                       |                  | 80                                         | 150  | Mean  | 80                                         | 150 | Mean  | 80                                         | 150  | Mean | 80                                         | 150   | Mean  | 80                                         | 150 | Mean |
| Fine                  | Without adjuvant | 0.14                                       | 0.11 | 0.12  | 173                                        | 161 | 167   | 0.56                                       | 0.64 | 0.60 | 1.93                                       | 6.72  | 4.32  | 32                                         | 144 | 88   |
|                       | Nimbus           | 0.09                                       | 0.10 | 0.10  | 179                                        | 173 | 176   | 0.66                                       | 0.50 | 0.58 | 4.35                                       | 3.73  | 4.04  | 51                                         | 68  | 60   |
|                       | Assist           | 0.08                                       | 0.16 | 0.12  | 209                                        | 188 | 198   | 0.55                                       | 0.57 | 0.56 | 2.42                                       | 4.84  | 3.63  | 24                                         | 75  | 49   |
|                       | Mean             | 0.10                                       | 0.12 | 0.11* | 187                                        | 174 | 180** | 0.59                                       | 0.57 | 0.58 | 2.90                                       | 5.10  | 4.00* | 36*                                        | 96* | 66   |
| Course                | Without adjuvant | 0.12                                       | 0.15 | 0.13  | 293                                        | 344 | 319   | 0.53                                       | 0.72 | 0.63 | 1.60                                       | 3.74  | 2.67  | 10                                         | 24  | 17   |
|                       | Nimbus           | 0.14                                       | 0.22 | 0.18  | 330                                        | 240 | 285   | 0.71                                       | 0.98 | 0.85 | 1.65                                       | 3.78  | 2.72  | 11                                         | 38  | 24   |
|                       | Assist           | 0.15                                       | 0.20 | 0.18  | 343                                        | 338 | 340   | 0.56                                       | 0.64 | 0.60 | 1.15                                       | 3.35  | 2.25  | 5                                          | 16  | 11   |
|                       | Mean             | 0.13                                       | 0.19 | 0.16* | 322                                        | 307 | 315** | 0.60                                       | 0.78 | 0.69 | 1.47                                       | 3.62  | 2.55* | 8*                                         | 26* | 17   |
| Application rate mean |                  | 0.12                                       | 0.16 | 0.14  | 255                                        | 240 | 248   | 0.59                                       | 0.67 | 0.63 | 2.18*                                      | 4.36* | 3.27  | 22                                         | 61  | 41   |

VMD: volume median diameter. \*significant at 0.05 level of significance; \*\* significant at 0.01 level of significance and ns not significant in ANOVA.

**Table S4.** Means of runoff to the soil.

| Droplet Class         | Adjuvant Use     | Runoff to the soil<br>( $\mu\text{g cm}^{-2}$ ) |       |      |
|-----------------------|------------------|-------------------------------------------------|-------|------|
|                       |                  | Application Rate                                |       | Mean |
|                       |                  | 80                                              | 150   |      |
| Fine                  | Without adjuvant | 3.11                                            | 4.64  | 3.88 |
|                       | Nimbus           | 2.63                                            | 3.00  | 2.82 |
|                       | Assist           | 2.42                                            | 2.50  | 2.46 |
|                       | Mean             | 2.72                                            | 3.38  | 3.05 |
| Course                | Without adjuvant | 3.32                                            | 3.67  | 3.49 |
|                       | Nimbus           | 3.12                                            | 6.17  | 4.64 |
|                       | Assist           | 2.73                                            | 4.52  | 3.62 |
|                       | Mean             | 3.05                                            | 4.79  | 3.92 |
| Application rate mean |                  | 2.89*                                           | 4.08* | 3.49 |

\*significant at 0.05 level of significance; \*\* significant at 0.01 level of significance and ns not significant in ANOVA.

**Table S5.** Correlation coefficients and statistical significance in correlations between variables.

|      | I     | So    | VMDu    | VMDm    | VMDi    | RAu   | RAi    | Cu     | Cm     | Ci     | Du     | Dm    | Di |
|------|-------|-------|---------|---------|---------|-------|--------|--------|--------|--------|--------|-------|----|
| I    | 1     |       |         |         |         |       |        |        |        |        |        |       |    |
| So   | 0.33* | 1     |         |         |         |       |        |        |        |        |        |       |    |
| VMDu | 0.31* | 0.24  | 1       |         |         |       |        |        |        |        |        |       |    |
| VMDm | 0.28* | 0.18  | 0.78**  | 1       |         |       |        |        |        |        |        |       |    |
| VMDi | 0.13  | 0.08  | 0.73**  | 0.84**  | 1       |       |        |        |        |        |        |       |    |
| RAu  | 0.08  | 0.18  | 0.03    | 0.18    | 0.16    | 1     |        |        |        |        |        |       |    |
| RAi  | 0.09  | 0.34* | -0.3*   | -0.25   | -0.26   | 0.28  | 1      |        |        |        |        |       |    |
| Cu   | 0.04  | 0.06  | -0.3*   | -0.34*  | -0.43** | 0     | 0.36*  | 1      |        |        |        |       |    |
| Cm   | 0.12  | 0.34* | -0.21   | -0.19   | -0.2    | 0.23  | 0.75** | 0.54** | 1      |        |        |       |    |
| Ci   | -0.01 | 0.19  | -0.51** | -0.49** | -0.52** | 0.17  | 0.84** | 0.47** | 0.63** | 1      |        |       |    |
| Du   | -0.11 | -0.08 | -0.55** | -0.53** | -0.56   | -0.01 | 0.35*  | 0.88** | 0.46** | 0.61** | 1      |       |    |
| Dm   | -0.12 | 0.18  | -0.51** | -0.54** | -0.49   | 0.09  | 0.63** | 0.5**  | 0.81** | 0.78** | 0.66** | 1     |    |
| Di   | 0.24  | -0.02 | 0.16    | -0.07   | -0.05   | 0.03  | -0.09  | -0.06  | -0.1   | -0.03  | -0.07  | -0.05 | 1  |

I: deposition in the lower third. So: solution runoff to the soil. VMD: volume median diameter; RA: relative span factor; C: coverage area; D: droplet density in the thirds u: upper; m: middle i: lower.
